# Supplementary material for: Mycoplasma contamination in the 1000 Genomes Project
Source: PubMed Central journal article supplement (PMC4022254; doi:10.1186/1756-0381-7-3), 2014-04-29
Supplement: 1756-0381-7-3-S1.pdf [file 1756-0381-7-3-S1.pdf]

## Additional File 1

### Mycoplasma Genomes Used

All the Mycoplasma genomes on FTP site <ftp.ncbi.nih.gov> files `genomes/Bacteria/Mycoplasma_*` were down loaded from (30 files, 24 November 2011) and incorporated into a Bowtie EBWT database and a colorspace database.

Table S1: Thirty species of Mycoplasma whose Genomes were used

| Genome fasta description     | Mycoplasma Complete Genome                                                |
|------------------------------|---------------------------------------------------------------------------|
| gi 148377268 ref NC_009497.1 | agalactiae PG2                                                            |
| gi 291319937 ref NC_013948.1 | agalactiae chromosome                                                     |
| gi 193082772 ref NC_011025.1 | arthritidis 158L3-1                                                       |
| gi 339320528 ref NC_015725.1 | bovis Hubei-1 chromosome                                                  |
| gi 313678134 ref NC_014760.1 | bovis PG45 chromosome                                                     |
| gi 83319253 ref NC_007633.1  | capricolum subsp. capricolum ATCC 27343                                   |
| gi 240047135 ref NC_012806.1 | conjunctivae HRC/581 chromosome                                           |
| gi 294155300 ref NC_014014.1 | crocodyli MP145 chromosome                                                |
| gi 308189587 ref NC_014552.1 | fermentans JER chromosome                                                 |
| gi 319776738 ref NC_014921.1 | fermentans M64 chromosome                                                 |
| gi 294660180 ref NC_004829.2 | gallisepticum str. R(low) chromosome                                      |
| gi 108885074 ref NC_000908.2 | genitalium G37                                                            |
| gi 321309518 ref NC_014970.1 | haemofelis str. Langford 1                                                |
| gi 269114774 ref NC_013511.1 | hominis ATCC 23114 chromosome                                             |
| gi 54019969 ref NC_006360.1  | hyopneumoniae 232                                                         |
| gi 72080342 ref NC_007332.1  | hyopneumoniae 7448 chromosome                                             |
| gi 71893359 ref NC_007295.1  | hyopneumoniae J chromosome                                                |
| gi 304372805 ref NC_014448.1 | hyorhinae HUB-1 chromosome                                                |
| gi 313664890 ref NC_014751.1 | leachii PG50 chromosome                                                   |
| gi 47458835 ref NC_006908.1  | mobile 163K                                                               |
| gi 330370665 ref NC_015407.1 | mycoides subsp. capri LC str. 95010 plasmid pMmc-95010, complete sequence |
| gi 331703020 ref NC_015431.1 | mycoides subsp. capri LC str. 95010                                       |
| gi 127763381 ref NC_005364.2 | mycoides subsp. mycoides SC str. PG1 chromosome                           |
| gi 26553452 ref NC_004432.1  | penetrans HF-2                                                            |
| gi 13507739 ref NC_000912.1  | pneumoniae M129                                                           |
| gi 15828471 ref NC_002771.1  | pulmonis UAB CTIP                                                         |
| gi 344204770 ref NC_015946.1 | putrefaciens KS1 chromosome                                               |
| gi 325972867 ref NC_015155.1 | suis str. Illinois chromosome                                             |
| gi 325989358 ref NC_015153.1 | suis KI3806                                                               |
| gi 71894025 ref NC_007294.1  | synoviae 53                                                               |
